# Supplementary material
Source: PubMed Central journal article supplement (PMC3658611)
Supplement: NIHMS464479-supplement-supplement_1.pdf [file NIHMS464479-supplement-supplement_1.pdf]

| Sex    | Medulla Volu | Diencephalor | Cerebellum v | Striatum Volu | Hippocampus | Septum Volu |
|--------|--------------|--------------|--------------|---------------|-------------|-------------|
| Female | 3.730        | 23.120       | 139.990      | 35.750        | 5.470       | 0.615       |
| Female | 3.810        | 23.260       | 154.799      | 31.370        | 5.220       | 0.550       |
| Female | 3.535        | 18.690       | 140.520      | 30.000        | 6.350       | 0.635       |
| Female | 3.475        | 17.760       | 126.800      | 29.760        | 6.380       | 0.525       |
| Female | 4.370        | 23.490       | 164.760      | 38.140        | 7.630       | 0.695       |
| Female | 4.360        | 23.690       | 148.080      | 40.860        | 6.770       | 0.545       |
| Female | 3.450        | 21.810       | 130.630      | 26.630        | 7.750       | 0.640       |
| Female | 4.360        | 23.290       | 155.300      | 32.480        | 5.920       | 0.585       |
| Female | 3.790        | 20.170       | 149.700      | 27.340        | 6.390       | 0.555       |
| Female | 3.880        | 21.170       | 130.660      | 33.440        | 8.260       | 0.490       |
| Female | 3.400        | 21.740       | 143.979      | 31.240        | 6.690       | 0.510       |
| Female | 3.770        | 24.860       | 149.980      | 37.670        | 7.080       | 0.810       |
| Female | 4.535        | 20.960       | 128.110      | 33.100        | 5.670       | 0.745       |
| Female | 3.875        | 23.930       | 130.520      | 34.870        | 7.040       | 0.760       |
| Female | 3.435        | 20.600       | 120.560      | 29.640        | 5.970       | 0.685       |
| Female | 3.920        | 19.140       | 122.500      | 27.770        | 6.120       | 0.530       |
| Female | 3.890        | 19.460       | 126.640      | 30.020        | 6.975       | 0.650       |
| Female | 3.825        | 23.890       | 148.759      | 35.810        | 5.650       | 0.575       |
| Female | 3.482        | 22.150       | 125.580      | 31.360        | 6.750       | 0.392       |
| Female | 3.968        | 21.310       | 128.379      | 32.130        | 6.740       | 0.562       |
| Female | 4.700        | 23.950       | 163.830      | 33.350        | 6.705       | 0.423       |
| Female | 3.124        | 19.380       | 140.469      | 25.660        | 6.880       | 0.768       |
| Female | 4.780        | 26.140       | 170.501      | 34.190        | 9.815       | 0.849       |
| Female | 4.220        | 24.730       | 142.739      | 33.560        | 8.100       | 0.833       |
| Female | 4.830        | 28.400       | 160.119      | 34.220        | 8.030       | 0.565       |
| Female | 4.375        | 26.710       | 157.310      | 34.790        | 8.210       | 0.848       |
| Female | 3.240        | 19.660       | 134.569      | 27.810        | 6.980       | 0.772       |
| Female | 3.595        | 20.360       | 132.109      | 29.950        | 9.180       | 0.535       |
| Female | 3.956        | 21.640       | 132.539      | 30.070        | 7.530       | 0.490       |
| Female | 4.845        | 23.620       | 160.119      | 32.240        | 7.020       | 0.583       |
| Female | 3.955        | 20.540       | 132.850      | 27.860        | 7.130       | 0.688       |
| Female | 4.396        | 25.480       | 151.340      | 32.210        | 8.410       | 0.350       |
| Female | 3.974        | 23.450       | 150.460      | 35.210        | 9.480       | 0.746       |
| Female | 4.222        | 21.720       | 170.101      | 33.010        | 8.670       | 0.532       |
| Female | 3.268        | 20.340       | 127.720      | 29.460        | 7.590       | 0.424       |
| Female | 3.872        | 21.360       | 148.040      | 29.090        | 6.520       | 0.416       |
| Female | 3.388        | 20.720       | 140.159      | 27.520        | 8.260       | 0.430       |
| Female | 3.974        | 20.570       | 166.999      | 30.100        | 8.890       | 0.548       |
| Female | 3.524        | 21.910       | 120.840      | 32.670        | 8.400       | 0.428       |
| Female | 3.722        | 20.760       | 154.100      | 33.730        | 8.960       | 0.612       |

|        |       |        |         |        |       |       |
|--------|-------|--------|---------|--------|-------|-------|
| Female | 4.200 | 20.690 | 153.380 | 34.750 | 8.430 | 0.544 |
| Female | 3.474 | 19.640 | 137.980 | 30.930 | 8.050 | 0.720 |
| Female | 3.700 | 23.170 | 146.700 | 32.460 | 9.180 | 0.486 |
| Female | 3.658 | 21.310 | 159.220 | 31.110 | 9.080 | 0.574 |
| Female | 4.620 | 23.210 | 165.641 | 33.605 | 8.560 | 0.586 |
| Male   | 3.725 | 23.300 | 156.720 | 35.140 | 7.140 | 0.725 |
| Male   | 4.445 | 25.270 | 155.040 | 36.820 | 6.150 | 0.570 |
| Male   | 3.698 | 21.990 | 153.930 | 34.710 | 5.940 | 0.805 |
| Male   | 3.960 | 21.950 | 177.280 | 35.860 | 5.760 | 0.535 |
| Male   | 4.425 | 26.070 | 174.980 | 39.160 | 7.720 | 0.575 |
| Male   | 3.895 | 21.790 | 151.351 | 30.500 | 6.190 | 0.585 |
| Male   | 4.565 | 23.260 | 161.370 | 41.940 | 6.090 | 0.790 |
| Male   | 4.430 | 23.440 | 160.679 | 37.510 | 5.920 | 0.845 |
| Male   | 4.460 | 21.730 | 178.770 | 33.720 | 7.260 | 0.495 |
| Male   | 4.010 | 19.020 | 137.700 | 33.820 | 8.290 | 0.670 |
| Male   | 4.035 | 20.900 | 139.360 | 34.020 | 6.960 | 0.625 |
| Male   | 4.465 | 21.630 | 160.289 | 42.250 | 6.070 | 0.545 |
| Male   | 4.415 | 22.180 | 153.230 | 34.350 | 7.600 | 0.715 |
| Male   | 5.050 | 27.090 | 187.849 | 35.660 | 8.760 | 0.785 |
| Male   | 3.300 | 20.190 | 129.559 | 26.640 | 5.155 | 0.400 |
| Male   | 4.920 | 26.440 | 180.420 | 40.320 | 5.290 | 0.815 |
| Male   | 4.065 | 26.590 | 166.080 | 32.890 | 7.630 | 0.595 |
| Male   | 4.510 | 27.300 | 128.140 | 33.910 | 6.140 | 0.660 |
| Male   | 4.715 | 24.900 | 150.710 | 33.470 | 7.800 | 0.455 |
| Male   | 5.100 | 27.810 | 195.780 | 36.200 | 9.080 | 0.675 |
| Male   | 5.392 | 25.230 | 180.480 | 40.495 | 7.990 | 0.683 |
| Male   | 4.850 | 27.890 | 170.111 | 36.410 | 8.815 | 0.796 |
| Male   | 4.685 | 27.980 | 188.389 | 35.705 | 8.580 | 0.746 |
| Male   | 4.655 | 27.590 | 169.389 | 32.180 | 9.430 | 0.524 |
| Male   | 4.310 | 24.540 | 165.011 | 31.800 | 9.810 | 0.418 |
| Male   | 4.935 | 24.940 | 164.280 | 32.310 | 7.550 | 0.570 |
| Male   | 4.597 | 25.780 | 172.290 | 33.340 | 7.750 | 0.572 |
| Male   | 4.790 | 26.110 | 161.410 | 33.550 | 9.330 | 0.348 |
| Male   | 4.665 | 25.670 | 166.989 | 32.940 | 9.580 | 0.877 |
| Male   | 4.590 | 26.050 | 171.421 | 32.370 | 7.690 | 0.628 |
| Male   | 4.690 | 23.140 | 163.650 | 33.510 | 8.490 | 0.852 |
| Male   | 4.694 | 22.440 | 141.130 | 34.110 | 8.135 | 0.714 |
| Male   | 4.908 | 26.420 | 188.069 | 33.145 | 9.050 | 0.654 |
| Male   | 3.806 | 23.650 | 140.159 | 33.230 | 7.500 | 0.724 |
| Male   | 4.112 | 25.070 | 159.740 | 33.030 | 8.290 | 0.704 |
| Male   | 4.882 | 27.280 | 183.160 | 35.545 | 8.930 | 0.574 |

|      |       |        |         |        |        |       |
|------|-------|--------|---------|--------|--------|-------|
| Male | 4.844 | 23.150 | 185.620 | 32.890 | 9.590  | 0.676 |
| Male | 4.146 | 22.090 | 169.841 | 34.820 | 8.280  | 0.538 |
| Male | 4.240 | 23.140 | 147.861 | 34.280 | 7.370  | 0.624 |
| Male | 4.112 | 21.100 | 164.120 | 33.020 | 7.660  | 0.514 |
| Male | 4.150 | 20.550 | 147.821 | 32.400 | 9.320  | 0.500 |
| Male | 4.112 | 21.660 | 169.941 | 31.170 | 9.660  | 0.744 |
| Male | 4.225 | 22.200 | 161.339 | 33.380 | 7.630  | 0.640 |
| Male | 4.660 | 24.710 | 187.879 | 34.100 | 7.610  | 0.648 |
| Male | 5.125 | 24.945 | 192.740 | 37.540 | 10.050 | 0.604 |

Subicular Cor Isocortex Vol Mesencephal Olfactory Cortex Volume (cm<sup>3</sup>)

|        |          |        |       |
|--------|----------|--------|-------|
| 7.920  | 1043.275 | 19.990 | 9.845 |
| 7.930  | 1000.675 | 23.120 | 7.645 |
| 8.580  | 960.919  | 18.665 | 9.005 |
| 8.840  | 996.501  | 18.645 | 7.265 |
| 11.230 | 1164.014 | 26.940 | 8.525 |
| 9.280  | 1196.696 | 24.370 | 7.715 |
| 8.100  | 981.901  | 19.320 | 8.035 |
| 8.510  | 1107.455 | 20.270 | 5.825 |
| 8.320  | 930.182  | 21.245 | 7.220 |
| 10.190 | 1008.783 | 20.455 | 6.470 |
| 9.860  | 950.701  | 22.420 | 5.805 |
| 9.860  | 1132.905 | 20.485 | 6.005 |
| 9.030  | 966.818  | 21.255 | 6.620 |
| 9.130  | 1088.363 | 19.110 | 9.715 |
| 7.320  | 944.665  | 18.195 | 6.740 |
| 8.480  | 944.079  | 19.305 | 5.585 |
| 9.520  | 933.443  | 20.540 | 6.755 |
| 7.830  | 1132.803 | 21.920 | 8.165 |
| 9.890  | 874.061  | 17.805 | 5.780 |
| 10.740 | 913.762  | 19.960 | 6.030 |
| 10.190 | 1374.960 | 25.490 | 7.990 |
| 9.385  | 799.103  | 18.735 | 7.605 |
| 12.425 | 1262.476 | 21.470 | 8.960 |
| 9.280  | 896.833  | 21.265 | 7.580 |
| 10.920 | 1159.043 | 24.620 | 7.680 |
| 12.100 | 1246.444 | 22.460 | 6.840 |
| 9.760  | 911.717  | 19.675 | 5.180 |
| 8.660  | 884.622  | 24.410 | 4.890 |
| 10.420 | 943.117  | 19.990 | 4.730 |
| 12.220 | 1290.416 | 23.940 | 5.360 |
| 8.080  | 892.798  | 21.270 | 5.820 |
| 8.215  | 967.059  | 20.840 | 6.505 |
| 10.905 | 1142.495 | 20.690 | 8.760 |
| 8.620  | 1222.080 | 20.850 | 7.970 |
| 6.145  | 962.544  | 18.835 | 5.185 |
| 6.900  | 975.178  | 22.015 | 4.985 |
| 8.180  | 984.043  | 20.175 | 5.565 |
| 8.300  | 917.599  | 20.155 | 6.000 |
| 9.645  | 966.238  | 18.730 | 6.795 |
| 10.240 | 1120.578 | 24.255 | 7.465 |

|        |          |        |       |
|--------|----------|--------|-------|
| 7.480  | 992.245  | 21.360 | 5.385 |
| 9.480  | 937.841  | 21.205 | 7.375 |
| 8.955  | 990.837  | 20.230 | 6.250 |
| 7.630  | 917.883  | 22.100 | 6.705 |
| 9.835  | 1061.459 | 24.320 | 5.680 |
| 8.480  | 1195.680 | 20.680 | 7.785 |
| 9.870  | 1160.945 | 22.980 | 6.755 |
| 10.120 | 1118.865 | 21.560 | 6.700 |
| 8.440  | 1115.179 | 25.115 | 7.730 |
| 11.500 | 1222.349 | 22.820 | 6.920 |
| 10.890 | 1073.157 | 20.690 | 7.745 |
| 10.400 | 1189.431 | 23.980 | 8.670 |
| 11.740 | 1177.760 | 23.080 | 7.805 |
| 9.840  | 1130.743 | 23.860 | 7.720 |
| 9.700  | 978.842  | 21.480 | 8.130 |
| 8.760  | 992.483  | 23.275 | 7.210 |
| 8.530  | 1109.184 | 22.040 | 6.060 |
| 9.000  | 1064.191 | 20.745 | 7.025 |
| 11.760 | 1243.643 | 27.120 | 6.705 |
| 6.500  | 879.998  | 18.760 | 6.120 |
| 9.970  | 1331.165 | 27.900 | 8.460 |
| 8.090  | 1269.477 | 26.145 | 8.430 |
| 7.220  | 1251.165 | 22.610 | 8.595 |
| 10.685 | 1269.845 | 25.135 | 5.280 |
| 9.570  | 1393.941 | 27.940 | 6.390 |
| 11.320 | 1373.174 | 28.010 | 7.475 |
| 11.590 | 1187.743 | 26.870 | 8.970 |
| 11.680 | 1263.663 | 27.420 | 8.810 |
| 10.430 | 1210.865 | 24.735 | 8.410 |
| 11.600 | 1139.278 | 21.830 | 7.570 |
| 8.610  | 1257.876 | 25.770 | 5.800 |
| 11.330 | 1115.078 | 22.110 | 7.370 |
| 12.180 | 1244.725 | 20.110 | 6.640 |
| 9.220  | 1279.737 | 23.550 | 8.200 |
| 9.040  | 1181.783 | 23.310 | 5.515 |
| 12.610 | 1171.242 | 25.945 | 8.560 |
| 10.100 | 1048.420 | 20.835 | 6.145 |
| 8.005  | 1256.066 | 28.320 | 8.740 |
| 9.500  | 1103.641 | 22.005 | 8.260 |
| 7.570  | 1192.074 | 21.940 | 6.015 |
| 9.255  | 1220.334 | 27.370 | 6.205 |

|        |          |        |       |
|--------|----------|--------|-------|
| 12.465 | 1140.235 | 24.235 | 7.000 |
| 9.990  | 1161.782 | 23.780 | 5.735 |
| 7.700  | 1089.942 | 21.085 | 6.980 |
| 7.065  | 1033.979 | 22.260 | 5.450 |
| 10.215 | 1001.336 | 21.715 | 4.990 |
| 7.290  | 1046.378 | 24.065 | 7.005 |
| 9.180  | 1143.741 | 23.350 | 7.260 |
| 8.810  | 1286.564 | 25.935 | 6.415 |
| 12.105 | 1256.255 | 25.840 | 5.750 |
